# Supplementary material for: A hierarchical porous carbon material from a loofah sponge network for high performance supercapacitors
Source: Royal Society of Chemistry journal article supplement (doi:10.1039/c5ra05688h), 2015-01-01
Supplement: c5ra05688h1.pdf [file c5ra05688h1.pdf]

# **Hierarchical Porous Carbon Material from Network Loofah Sponge for High Performance Supercapacitors**

Yuting Luan, Lei Wang, Shien Guo, Baojiang Jiang,\* Dongdong Zhao, Haijing Yan, Chungui Tian,  
Honggang Fu\*

Key Laboratory of Functional Inorganic Material Chemistry, Ministry of Education of the People's Republic of  
China, Heilongjiang University, Harbin 150080, China.

E-mail: fuhg@vip.sina.com; jiangbaojiang88@sina.com

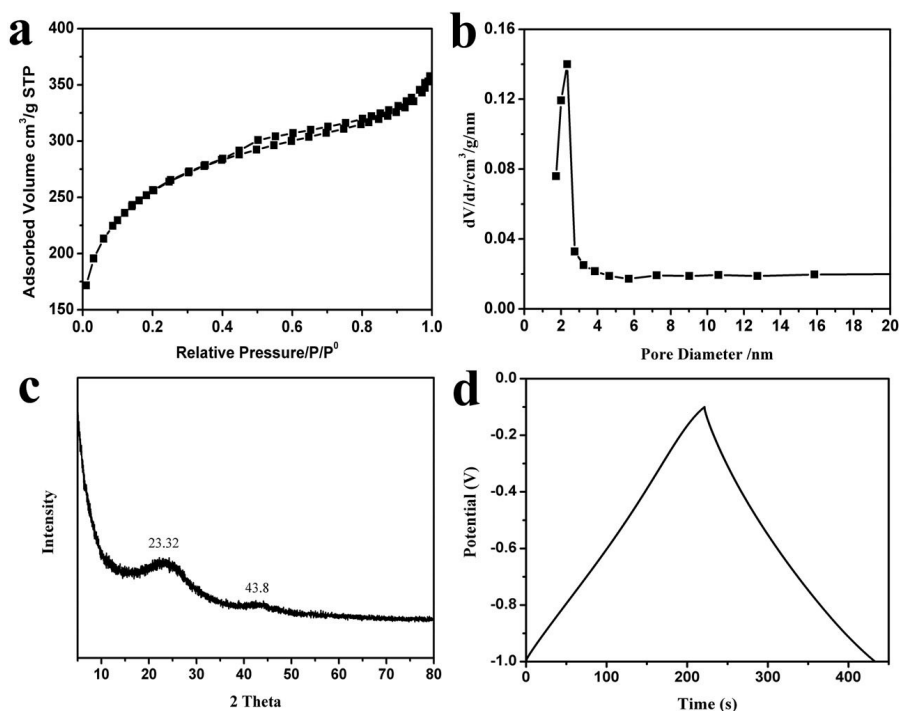

**Figure S1.** The LS sample activated by ZnCl<sub>2</sub> (a) N<sub>2</sub> sorption isotherms and porosity characteristics of LS activated by ZnCl<sub>2</sub>, (b) pore size distribution of LS activated by ZnCl<sub>2</sub>, (c) XRD pattern of the LS activated by ZnCl<sub>2</sub>, and (d) charge-discharge curves of LS activated by ZnCl<sub>2</sub> at the current density of 1 A g<sup>-1</sup> in the 6 M KOH electrolyte.

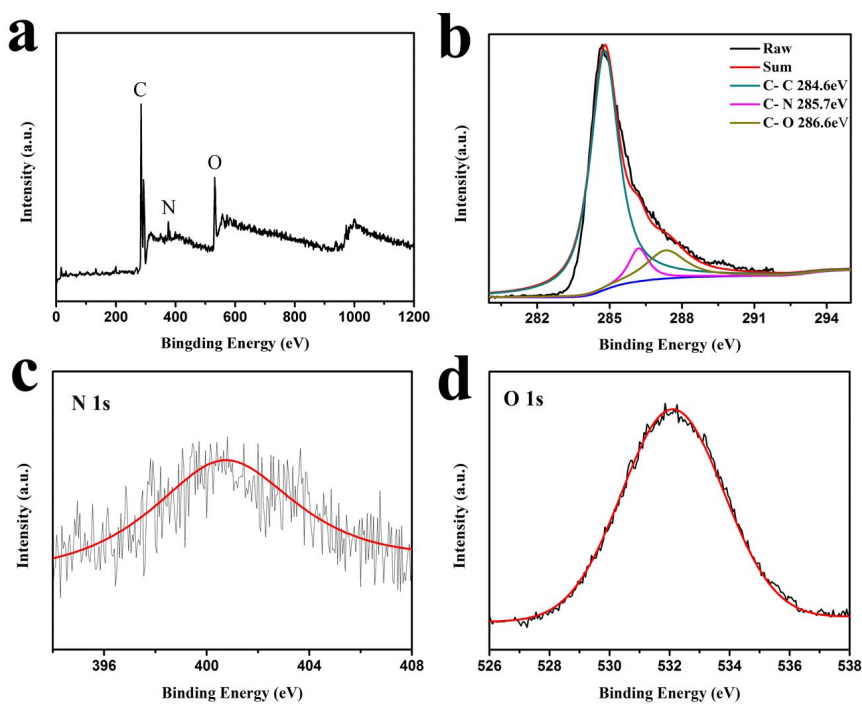

**Figure S2.** The total XPS spectra of LS (a), and C 1s (b), N 1s (c), O 1s (d) spectra of LS.

**Table S1.** Chemical composition of LS materials determined by X-ray photoelectron spectroscopy.

| XPS (atom%) | LS    | LS-600 | LS-700 | LS-800 | LS-900 | LS-1000 |
|-------------|-------|--------|--------|--------|--------|---------|
| C           | 72.95 | 74.62  | 76.23  | 79.38  | 81.47  | 83.67   |
| N           | 2.56  | 2.06   | 1.88   | 1.64   | 1.39   | 1.09    |
| O           | 24.49 | 23.32  | 21.89  | 18.98  | 17.14  | 15.24   |

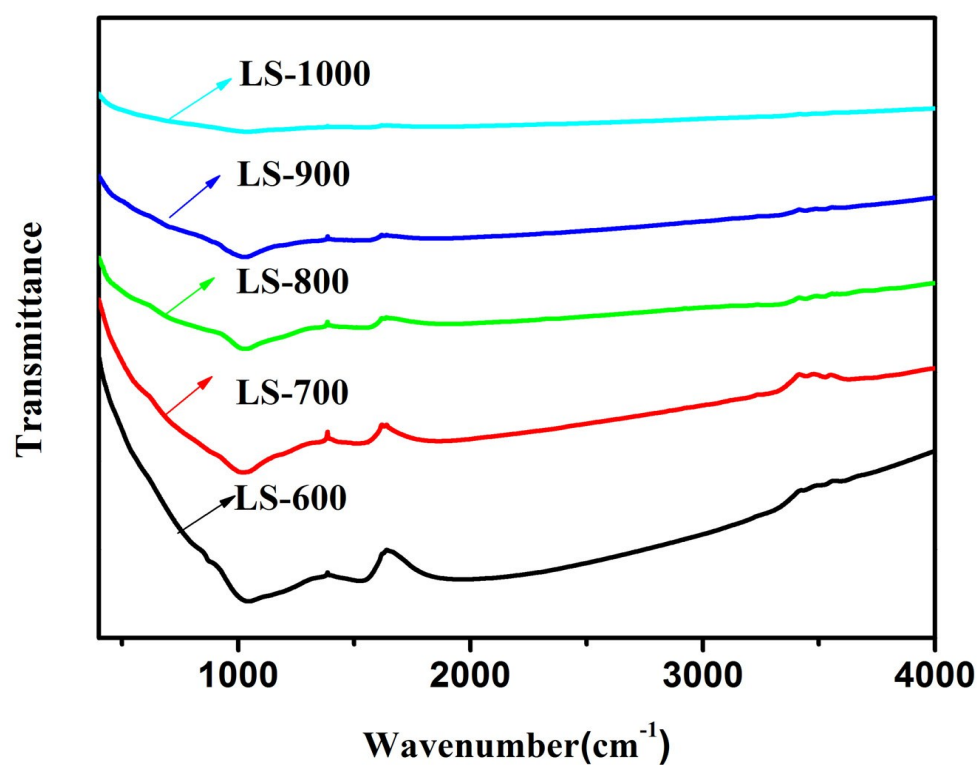

**Figure S3.** IR of the LS-600 to LS-1000.

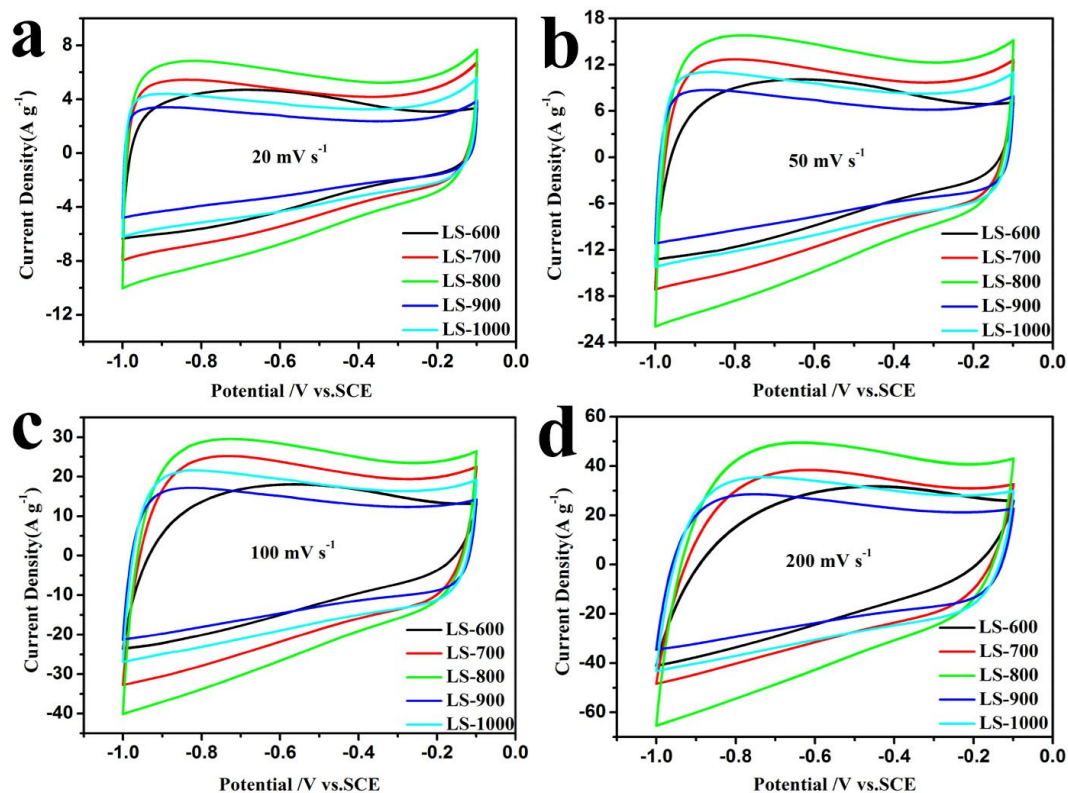

**Figure S4.** Cyclic voltammograms (CV) measurements of LS-600 to LS-1000 in 6 M KOH aqueous solution under a potential range from -1.0 to -0.1V at a scan rate of (a) 20 mV s<sup>-1</sup>, (b) 50 mV s<sup>-1</sup>, (c) 100 mV s<sup>-1</sup> (d) 200 mV s<sup>-1</sup>.

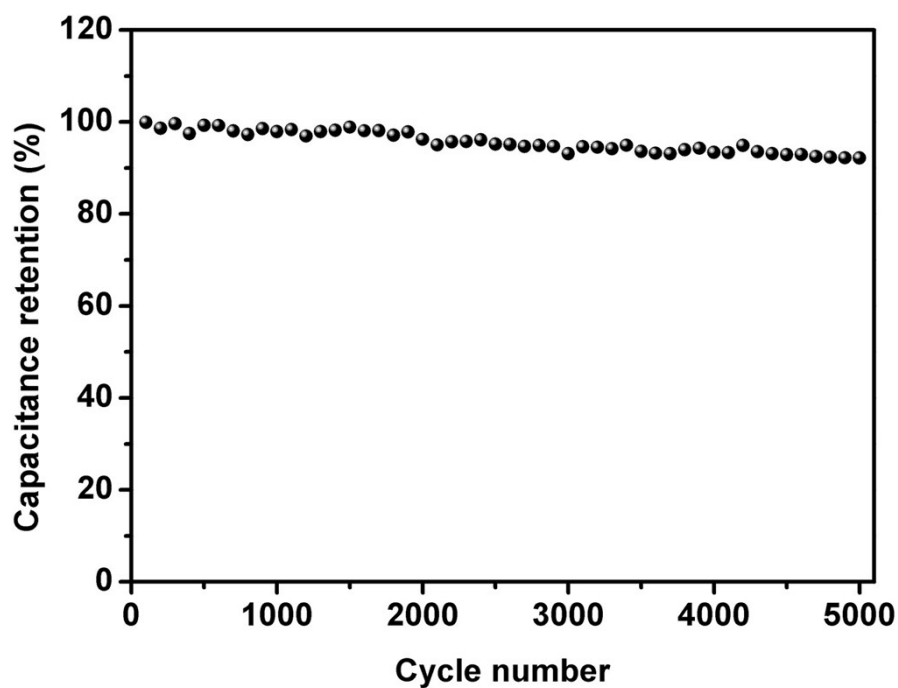

**Figure S5.** Electrochemical performance of LS-800 in a two-electrode system at a constant current density of 1 A/g for 5 000 cycles in 6 M KOH solution.

**Table S2.** Comparison of the properties of carbon materials synthesized use in supercapacitors.

| Material                | Activating agent | $S_{\text{BET}}$ ( $\text{m}^2\text{g}^{-1}$ ) | Pore size (nm) | Electrolyte                  | Maximum capacitance ( $\text{F g}^{-1}$ ) | Measurement condition   | Reference |
|-------------------------|------------------|------------------------------------------------|----------------|------------------------------|-------------------------------------------|-------------------------|-----------|
| Loofah sponge           | KOH              | 1733                                           | 1.97           | 6 M KOH                      | 304                                       | 1 A $\text{g}^{-1}$     | Our work  |
| Cornstalk               | HCl              | 540                                            | 2.3/9.2        | 6 M KOH                      | 213                                       | 1 A $\text{g}^{-1}$     | Ref. 43   |
| Coconut shell           | $\text{ZnCl}_2$  | 1874                                           | 3.0            | 6 M KOH                      | 268                                       | 1 A $\text{g}^{-1}$     | Ref. 44   |
| Camellia oleifera shell | $\text{ZnCl}_2$  | 1935                                           | 2.1            | 1 M $\text{H}_2\text{SO}_4$  | 376                                       | 0.2 A $\text{g}^{-1}$   | Ref. 50   |
| Eggshell Membranes      | KOH/HCl          | 221.2                                          | 1.2            | 1 M KOH                      | 297                                       | 0.2 A $\text{g}^{-1}$   | Ref. 51   |
| Seed shells             | KOH              | 2062                                           | 1.4            | 30 wt% KOH                   | 355                                       | 0.125 A $\text{g}^{-1}$ | Ref. 52   |
| Banana fibers           | $\text{ZnCl}_2$  | 1097                                           | 2.5            | 1 M $\text{Na}_2\text{SO}_4$ | 74                                        | 0.5 A $\text{g}^{-1}$   | Ref. 53   |
| Waste paper             | KOH              | 416                                            | 5.9            | 6 M KOH                      | 180                                       | 0.01 A $\text{cm}^{-2}$ | Ref. 54   |
| Sunflower seed shell    | KOH              | 2509                                           | 2.1            | 30 wt% KOH                   | 311                                       | 0.25 A $\text{g}^{-1}$  | Ref. 55   |
| Sugar-cane bagasse      | $\text{ZnCl}_2$  | 1788                                           | 1.2            | 1 M $\text{H}_2\text{SO}_4$  | 300                                       | 0.25 A $\text{g}^{-1}$  | Ref. 56   |

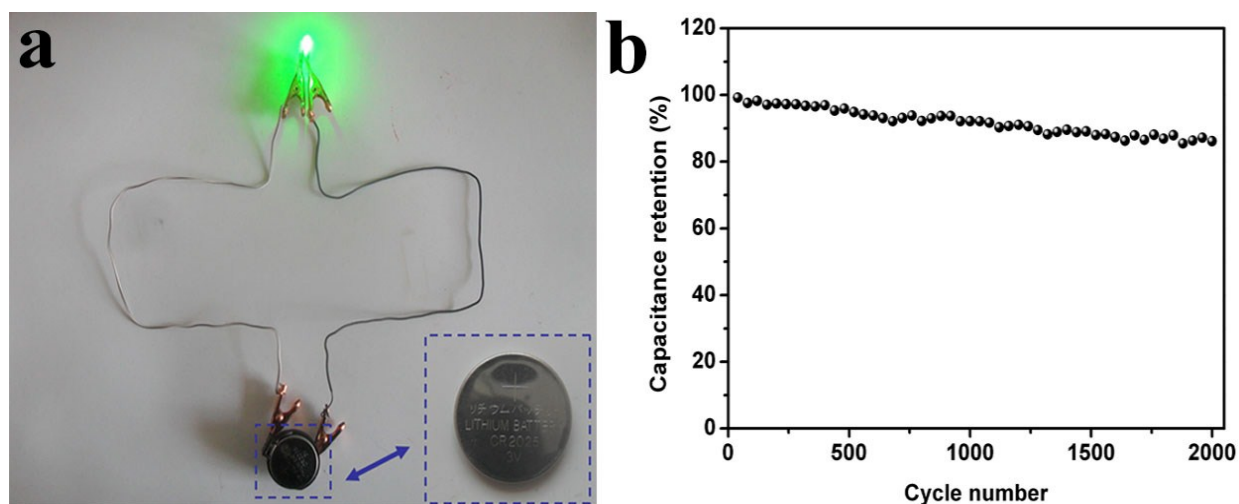

**Figure S6.** (a) Two fully assembled two-electrode series cells from LS-800 in organic 1M  $\text{Et}_4\text{NBF}_4$ -PC electrolyte to light a LED bulb. (b) Electrochemical performance of LS-800 in a two-electrode system at 1 A/g for 2000 cycles.
